# Supplementary material for: Antifungal Effect of Vitamin D3 against Cryptococcus neoformans Coincides with Reduced Biofilm Formation, Compromised Cell Wall Integrity, and Increased Generation of Reactive Oxygen Species
Source: MDPI journal article supplement (doi:10.3390/jof9070772), 2023-07-21
Supplement: s1 [file s1]

## Supplementary Material

### Antifungal Effect of Vitamin D<sub>3</sub> against *Cryptococcus neoformans* Coincides with Reduced Biofilm Formation, Compromised Cell Wall Integrity, and Increased Generation of Reactive Oxygen Species

Jian Huang, Junwen Lei, Anni Ge, Wei Xiao, Caiyan Xin, Zhangyong Song \*  
and Jinping Zhang \*

Public Center of Experimental Technology, School of Basic Medical Sciences,  
Southwest Medical University, Luzhou 646000, China;  
jane\_h9843@163.com (J.H.)

\* Correspondence: szy83529@163.com (Z.S.); zhangjpwcx@163.com (J.Z.)

**Table S1.** Nucleotide sequences of primers used for RT-qPCR analysis.

| Gene           | Primer Sequence (5'-3') |
|----------------|-------------------------|
| <i>GPD1 F</i>  | AGTATGACTCCACACATGGTCG  |
| <i>GPD1 R</i>  | AGACAAACATCGGAGCATCAGC  |
| <i>CHS3 F</i>  | ACCCAGGTCTGGCATTCC      |
| <i>CHS3 R</i>  | AGGATCAACATTGGAAGC      |
| <i>CHS4 F</i>  | CGGTCTTCAGGCATTGATTT    |
| <i>CHS4 R</i>  | TTCGGAGTGAAGTGATGCTG    |
| <i>CHS5 F</i>  | GCTTGATGATCTTCTATATCTG  |
| <i>CHS5 R</i>  | TACCTTCATCATGGATGACA    |
| <i>CHS6 F</i>  | TTGACCCTTGGCACATCT      |
| <i>CHS6 R</i>  | GTTGGCATAAGTATCCTT      |
| <i>CDA1 F</i>  | TCGAGCTATTGCTGCTCAGA    |
| <i>CDA1 R</i>  | GCTGGTAGATGTCGTGCTCA    |
| <i>CDA2 F</i>  | GTAACGAGGTCGTCTTTG      |
| <i>CDA2 R</i>  | TGTAGTTGGTGAGCTCGT      |
| <i>CDA3 F</i>  | ATGTGGCCGATGCTTTTAAC    |
| <i>CDA3 R</i>  | GAAGTGAGAAGGCCTGTTGG    |
| <i>CDA4 F</i>  | CGAACTCTCCAAGGTCGAAG    |
| <i>CDA4 R</i>  | GCGTCTCCAGTGTGCATCAGA   |
| <i>CHI22 F</i> | AATGTGAGTGGGTCGGAAAG    |
| <i>CHI22 R</i> | TAGCCGCCGAGTCTGTAGAT    |
| <i>AGS1 F</i>  | ATCCTTATCCGTTATTCC      |
| <i>AGS1 R</i>  | AGCTGTTCTCTAGCGAGC      |
| <i>FKS1 F</i>  | TGGACTGGTGTGTTGGTTCAA   |
| <i>FKS1 R</i>  | GTACAAAAGACCGTACTTG     |
| <i>SKN1 F</i>  | CTGGACAATGTATGCGGATG    |
| <i>SKN1 R</i>  | TCCGCAGTGGGATAATCTTC    |
| <i>KRE6 F</i>  | GTCTCGGAAGGCGACTCAT     |

|               |                       |
|---------------|-----------------------|
| <i>KRE6 R</i> | TCAACTCATTCTTTGGGAAGG |
| <i>LAC1 F</i> | TACAACTTTCCCCGACCTC   |
| <i>LAC1 R</i> | GATGGAGAAGGTGAGCGTC   |
| <i>LAC2 F</i> | TGTATGGCGCAAGGGGTTACT |
| <i>LAC2 R</i> | AGAACACGACTCTCCAAAGC  |

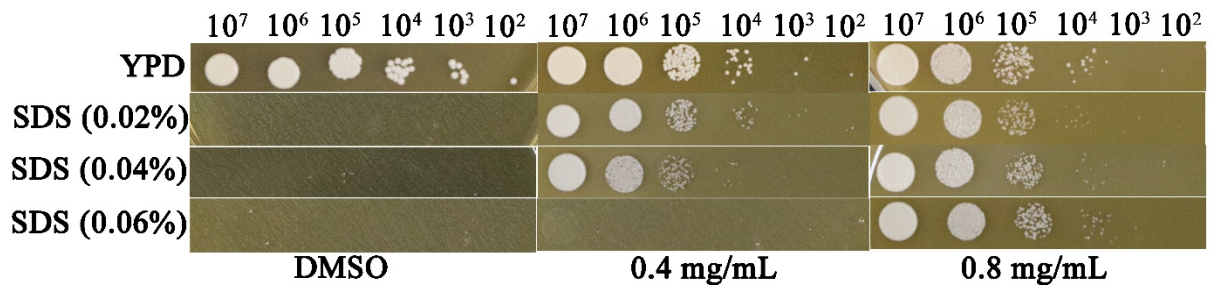

**Figure S1.** VD<sub>3</sub> reduced the stress of SDS with high concentrations. An overnight culture of *C. neoformans* strain H99 was washed and diluted to  $1 \times 10^7$  cells/mL in phosphate-buffered saline (PBS). Sensitivity to cell surface stress was evaluated with 0.02%, 0.04%, 0.06% SDS (Sigma-Aldrich Corporation). In brief, the cell suspensions were serially diluted in YPD medium containing different concentrations of VD<sub>3</sub> (0, 0.4 and 0.8 mg/mL) with or without the stressors, incubated at 37°C for 3 days, and photographed.

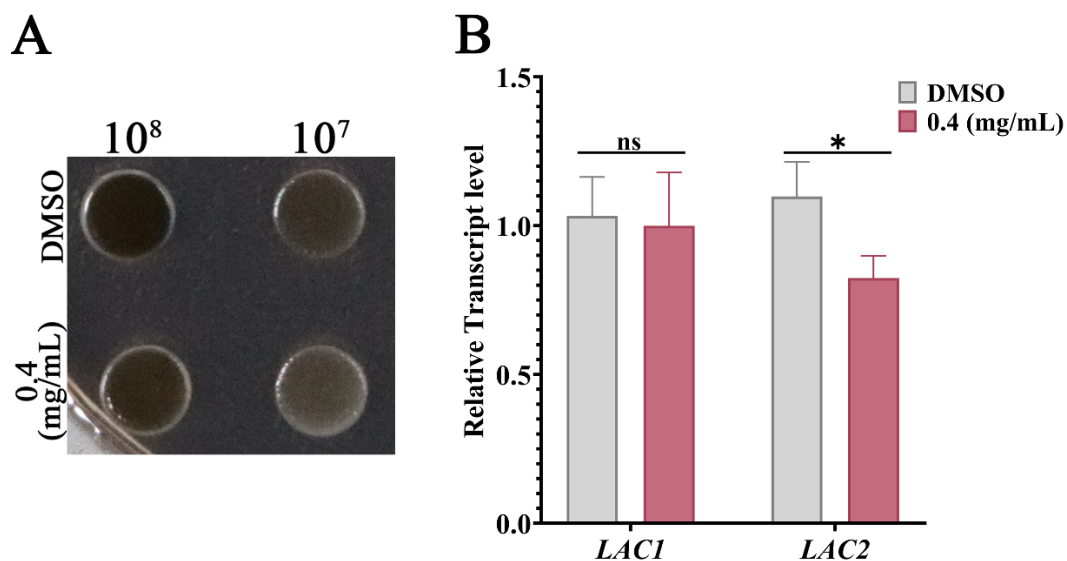

**Figure S2.** Effects of VD<sub>3</sub> on melanin formation. *C. neoformans* was cultured in YPD medium containing 0.4 mg/mL DMSO or VD<sub>3</sub> for 6 h. (A) VD<sub>3</sub> inhibited melanization on minimal medium containing 0.5 mM L-DOPA (3,4-dihydroxy-L-phenylalanine; Sigma-Aldrich Corporation). Images were captured after incubation for 3 days. (B) RT-qPCR quantification of the expression of genes related to melanin biosynthesis. Relative expression levels of genes were calculated using  $2^{-\Delta\Delta CT}$  method against *GPD1* as the housekeeping gene. Data were analyzed using t-test (ns,  $p > 0.05$ ; \*,  $p < 0.05$ ; \*\*,  $p < 0.01$ ; \*\*\*,  $p < 0.001$ ; \*\*\*\*,  $p < 0.0001$ ).
